# Supplementary material for: A Genome-Wide Expression Profile of Salt-Responsive Genes in the Apple Rootstock Malus zumi
Source: Int J Mol Sci. 2013 Oct 18;14(10):21053–70. doi: 10.3390/ijms141021053 (PMC3821658; doi:10.3390/ijms141021053)
Supplement: Supplementary file 1 [file ijms-14-21053-s001.pdf]

## Supplementary Information

**Table S1.** Categories of transcripts significantly regulated in salt-stressed *Malus zumi*.

| Number               | Expression <sup>a</sup> | Putative Annotation                              | Genome locus | Genebank Accession | Identities | <i>p</i> -value <sup>b</sup> |
|----------------------|-------------------------|--------------------------------------------------|--------------|--------------------|------------|------------------------------|
| Signal transduction  |                         |                                                  |              |                    |            |                              |
| Kinase               |                         |                                                  |              |                    |            |                              |
| 1                    | I                       | leucine-rich repeat transmembrane protein kinase | Chr 15       | NP_199948          | 64%        | $5.41 \times 10^{-5}$        |
| 1                    | S                       | leucine-rich repeat family protein kinase        | Chr 15       | NP_179336          | 42%        | $1.02 \times 10^{-4}$        |
| 1                    | I                       | tousled-like serine/threonine kinase             | Chr 11       | NP_568405          | 82%        | $3.20 \times 10^{-5}$        |
| 1                    | I                       | CIPK5                                            | Chr 1        | NP_568241          | 79%        | $7.74 \times 10^{-5}$        |
| 1                    | S                       | CIPK6                                            | Chr 2        | NP_194825          | 80%        | $1.98 \times 10^{-7}$        |
| 1                    | S                       | protein kinase family protein                    | Chr 6        | NP_194952          | 50%        | $2.25 \times 10^{-5}$        |
| Transcription factor |                         |                                                  |              |                    |            |                              |
| 1                    | I                       | IAA-LEUCINE RESISTANT3                           | Chr 3        | NP_200279          | 89%        | $4.97 \times 10^{-4}$        |
| 1                    | I                       | IAA26                                            | Chr 15       | NP_188271          | 80%        | $3.58 \times 10^{-6}$        |
| 1                    | S                       | GT-like trihelix DNA-binding protein             | Chr 15       | NP_177814          | 37%        | $3.04 \times 10^{-6}$        |
| 1                    | S                       | zinc finger (CCCH-type) family protein           | Chr 11       | NP_200670          | 59%        | $8.13 \times 10^{-5}$        |
| 1                    | I                       | WRKY family transcription factor                 | Chr 12       | NP_001078015       | 50%        | $4.52 \times 10^{-5}$        |
| 1                    | S                       | GRAS family transcription factor                 | Chr 10       | XP_002322514       | 52%        | $3.58 \times 10^{-4}$        |
| 2                    | S                       | AP2 transcription factor                         | Chr 15       | NP_173355          | 70%        | $4.26 \times 10^{-6}$        |
| 1                    | I                       | SALT TOLERANCE homolog protein                   | Chr 5        | NP_849598          | 68%        | $5.37 \times 10^{-7}$        |
| 1                    | S                       | Auxin response factor                            | Chr 7        | NP_182176          | 70%        | $2.78 \times 10^{-3}$        |

Table S1. Cont.

| Number          | Expression <sup>a</sup> | Putative Annotation                    | Genome locus | Genebank Accession | Identities | p-value <sup>b</sup>  |
|-----------------|-------------------------|----------------------------------------|--------------|--------------------|------------|-----------------------|
| ROS elimination |                         |                                        |              |                    |            |                       |
| 1               | S                       | glutathione transferase                | Chr 3        | NP_850479          | 62%        | $3.17 \times 10^{-8}$ |
| 1               | S                       | peroxidase                             | Chr 2        | NP_201440          | 71%        | $4.26 \times 10^{-3}$ |
| 1               | S                       | peroxidase                             | Chr 10       | NP_197022          | 54%        | $3.81 \times 10^{-7}$ |
| 1               | S                       | peroxidase                             | Chr 10       | NP_192868          | 64%        | $4.23 \times 10^{-6}$ |
| 1               | I                       | catalase                               | Chr 6        | NP_001031791       | 92%        | $2.58 \times 10^{-4}$ |
| 2               | S                       | Metallothionein-like protein type 2    | Chr 1        | AAC23697           | 94%        | $3.26 \times 10^{-7}$ |
| 1               | S                       | metallothionein-like protein           | Chr 11       | BAA96449           | 89%        | $4.13 \times 10^{-5}$ |
| 40              | I                       | METALLOTHIONEIN 3                      | Chr 11       | NP_566509          | 54%        | $5.05 \times 10^{-3}$ |
| 1               | S                       | Quinone oxidoreductase-like protein    | Chr 9        | NP_173786          | 73%        | $4.21 \times 10^{-7}$ |
| 1               | I                       | NADPH quinone oxidoreductase           | Chr 2        | NP_189427          | 84%        | $3.56 \times 10^{-6}$ |
| 1               | I                       | Cytochrome P450, CPD                   | Chr 1        | NP_001031838       | 72%        | $3.78 \times 10^{-8}$ |
| 1               | S                       | Agglutinin                             | Chr 6        | AAL05954           | 41%        | $2.39 \times 10^{-7}$ |
| 1               | I                       | cytochrome P450                        | Chr 6        | NP_974574          | 83%        | $4.25 \times 10^{-7}$ |
| 2               | S                       | copper ion binding protein             | Chr 15       | NP_197523          | 46%        | $3.89 \times 10^{-3}$ |
| Osmoregulation  |                         |                                        |              |                    |            |                       |
| 1               | S                       | sorbitol dehydrogenase                 | Chr 1        | NP_200010          | 84%        | $6.78 \times 10^{-8}$ |
| 6               | I                       | mannose 6-phosphate reductase          | Chr 10       | NP_179722.         | 71%        | $7.36 \times 10^{-5}$ |
| 5               | I                       | mannose 6-phosphate reductase          | Chr 10       | NP_179721          | 72%        | $2.21 \times 10^{-4}$ |
| 1               | I                       | plasma membrane intrinsic protein      | Chr 14       | BAD14372           | 90%        | $1.86 \times 10^{-8}$ |
| 1               | S                       | plasma membrane intrinsic protein 2    | Chr 1        | NP_181254          | 89%        | $8.91 \times 10^{-7}$ |
| 2               | I                       | tonoplast intrinsic protein 2          | Chr 12       | NP_192056          | 77%        | $7.35 \times 10^{-9}$ |
| 3               | I                       | plasma membrane intrinsic protein 2    | Chr 12       | NP_191042          | 81%        | $3.69 \times 10^{-3}$ |
| 1               | I                       | sodium dependent phosphate transporter | Chr 3        | NP_180526          | 89%        | $5.34 \times 10^{-4}$ |
| 1               | I                       | D-sorbitol-6-phosphate dehydrogenase   | Chr 10       | BAA01853           | 98%        | $4.38 \times 10^{-7}$ |
| 1               | S                       | plasma membrane intrinsic protein 1    | Chr 14       | NP_191702          | 95%        | $5.47 \times 10^{-3}$ |
| 1               | I                       | tonoplast intrinsic protein 1          | Chr11        | NP_001045562       | 73         | $4.37 \times 10^{-5}$ |

Table S1. Cont.

| Number           | Expression <sup>a</sup> | Putative Annotation                           | Genome locus | Genebank Accession | Identities | p-value <sup>b</sup>  |
|------------------|-------------------------|-----------------------------------------------|--------------|--------------------|------------|-----------------------|
| Stress tolerance |                         |                                               |              |                    |            |                       |
| 1                | S                       | Mlp-like protein 28,MLP28                     | Chr 13       | NP_001077806       | 39%        | $7.35 \times 10^{-4}$ |
| 1                | S                       | major latex protein                           | Chr 13       | AAQ07269           | 62%        | $8.50 \times 10^{-7}$ |
| 2                | I                       | dehydrin                                      | Chr 2        | ABG56268           | 68%        | $3.58 \times 10^{-6}$ |
| 1                | I                       | early drought induced protein                 | Chr 12       | NP_001107634       | 83%        | $8.39 \times 10^{-3}$ |
| 1                | S                       | aldo/keto reductase family protein            | Chr 4        | NP_001031505       | 66%        | $5.32 \times 10^{-7}$ |
| 5                | I                       | RD22                                          | Chr 5        | NP_197943          | 48%        | $3.56 \times 10^{-8}$ |
| 2                | I                       | abscisic stress ripening-like protein         | Chr 9        | AAL26889           | 82%        | $3.85 \times 10^{-4}$ |
| 1                | S                       | Low-molecular-weight cysteine-rich protein    | Chr 16       | NP_178319          | 65%        | $4.72 \times 10^{-5}$ |
| 1                | S                       | major allergen mal d 1                        | Chr 13       | AAD26552           | 100%       | $5.36 \times 10^{-6}$ |
| 1                | S                       | polyphenol oxidase 2 precursor                | Chr 5        | AAK56323           | 93%        | $4.38 \times 10^{-7}$ |
| 2                | I                       | Aldehyde dehydrogenase                        | Chr 12       | NP_567962          | 56%        | $7.32 \times 10^{-5}$ |
| 1                | S                       | disease resistance protein                    | Chr 6        | XP_002318626       | 44%        | $3.54 \times 10^{-7}$ |
| 1                | I                       | pathogenesis-related thaumatin family protein | Chr 9        | NP_973870          | 55%        | $4.32 \times 10^{-4}$ |
| 1                | I                       | heat shock protein 70                         | Chr 1        | NP_187864          | 97%        | $2.89 \times 10^{-3}$ |
| 1                | I                       | major allergen Mal d                          | Chr 13       | AAX18313           | 77%        | $7.36 \times 10^{-7}$ |
| 3                | S                       | UV-induced protein uvi31/ BOLA family protein | Chr 14       | NP_001151829       | 74%        | $6.35 \times 10^{-5}$ |
| Photosynthesis   |                         |                                               |              |                    |            |                       |
| 1                | S                       | 1-deoxy-D-xylulose-5-phosphate synthase       | Chr 16       | NP_193291          | 41%        | $5.20 \times 10^{-4}$ |
| 1                | I                       | lil3 protein                                  | Chr 15       | NP_199522          | 51%        | $2.56 \times 10^{-7}$ |
| 2                | I                       | photosystem II subunit R                      | Chr 10       | NP_178025          | 75%        | $3.43 \times 10^{-6}$ |
| 1                | I                       | Chlorophyll a/b binding protein 1             | Chr 17       | NP_174286          | 67%        | $4.38 \times 10^{-3}$ |
| 2                | I                       | PSAF (photosystem I subunit F)                | Chr 12       | NP_174418          | 72%        | $3.75 \times 10^{-5}$ |
| 1                | I                       | photosystem II CP43 chlorophyll apoprotein    | Chr 11       | YP_002149729       | 90%        | $6.54 \times 10^{-8}$ |

Table S1. Cont.

| Number | Expression <sup>a</sup> | Putative Annotation                            | Genome locus | Genebank Accession | Identities | p-value <sup>b</sup>  |
|--------|-------------------------|------------------------------------------------|--------------|--------------------|------------|-----------------------|
| 1      | I                       | photosystem I subunit D-2                      | Chr 16       | NP_171812          | 72%        | $8.79 \times 10^{-4}$ |
| 1      | I                       | Thylakoid membrane phosphoprotein of 14 kda    | Chr 10       | NP_566086          | 64%        | $9.54 \times 10^{-7}$ |
| 1      | I                       | Photosystem I light harvesting complex gene 3  | Chr 17       | NP_176347          | 81%        | $5.37 \times 10^{-6}$ |
| 1      | I                       | cytochrome b6                                  | Chr 10       | NP_051088          | 98%        | $5.86 \times 10^{-7}$ |
| 1      | I                       | ATP synthase gamma chain                       | Chr 10       | NP_567265          | 77%        | $7.35 \times 10^{-4}$ |
| 1      | I                       | NADH dehydrogenase subunit 7                   | Chr 17       | NP_051115          | 87%        | $2.36 \times 10^{-7}$ |
| 2      | I                       | photosystem II 44 kDa protein                  | Chr 8        | NP_051055          | 97%        | $5.38 \times 10^{-5}$ |
| 5      | I                       | light-harvesting complex I protein Lhca3       | Chr 17       | XP_002321218       | 81%        | $6.67 \times 10^{-6}$ |
| 1      | I                       | Oxygen-evolving enhancer protein               | Chr 8        | NP_201458          | 83%        | $4.31 \times 10^{-3}$ |
| 1      | I                       | PSBP-1 (Photosystem II subunit P-1)            | Chr 17       | NP_172153          | 64%        | $3.34 \times 10^{-4}$ |
| 1      | I                       | Ferredoxin-NADP(+)-oxidoreductase 1            | —            | NP_201420          | 76%        | $4.53 \times 10^{-5}$ |
| 1      | I                       | plastid-lipid-associated protein               | Chr 17       | NP_192311          | 44%        | $5.61 \times 10^{-4}$ |
| 65     | I                       | ribulose-1,5-bisphosphate carboxylase          | Chr 3        | CAA79857           | 91%        | $5.64 \times 10^{-6}$ |
| 1      | I                       | photosystem I P700 chlorophyll a apoprotein A2 | Chr 13       | NP_051058          | 98%        | $6.35 \times 10^{-3}$ |
| 7      | I                       | light-harvesting complex II protein Lhcb2      | Chr 16       | XP_002321186       | 92%        | $6.89 \times 10^{-7}$ |
| 1      | I                       | light-harvesting complex I protein Lhca4       | Chr 6        | XP_002330127       | 75%        | $8.32 \times 10^{-6}$ |
| 1      | I                       | light-harvesting complex I protein Lhca2       | Chr 17       | XP_002299309       | 94%        | $3.57 \times 10^{-4}$ |
| 1      | I                       | Photosystem II subunit O-2                     | Chr 8        | NP_190651          | 75%        | $4.25 \times 10^{-5}$ |
| 1      | S                       | PsbP domain-containing protein                 | —            | NP_565131          | 65%        | $6.31 \times 10^{-7}$ |
| 5      | I                       | light-harvesting complex II protein Lhcb1      | Chr 5        | XP_002316737       | 95%        | $2.58 \times 10^{-2}$ |
| 6      | I                       | light-harvesting complex II protein Lhcb6      | Chr 2        | XP_002303160       | 82%        | $5.34 \times 10^{-5}$ |
| 1      | I                       | light-harvesting complex II protein Lhcb5      | Chr 5        | XP_002329192       | 81%        | $6.41 \times 10^{-7}$ |
| 2      | I                       | photosystem II 22 kDa protein                  | Chr 15       | NP_001150026       | 91%        | $3.59 \times 10^{-3}$ |
| 2      | I                       | protochlorophyllide reductase                  | Chr 11       | NP_200230          | 65%        | $5.34 \times 10^{-7}$ |
| 1      | I                       | Clp protease proteolytic subunit 6             | Chr 10       | NP_563893          | 45%        | $4.37 \times 10^{-5}$ |

Table S1. Cont.

| Number      | Expression <sup>a</sup> | Putative Annotation                                                       | Genome locus | Genebank Accession | Identities | p-value <sup>b</sup>  |
|-------------|-------------------------|---------------------------------------------------------------------------|--------------|--------------------|------------|-----------------------|
| 2           | I                       | magnesium chelatase H subunit                                             | Chr 15       | ACO57443           | 100%       | $1.82 \times 10^{-8}$ |
| 1           | I                       | carbonic anhydrase                                                        | Chr 9        | NP_186799          | 61%        | $2.59 \times 10^{-4}$ |
| 1           | I                       | starch synthase                                                           | Chr 7        | NP_174566          | 36%        | $1.56 \times 10^{-4}$ |
| 1           | I                       | glucose-1-phosphate adenylyltransferase                                   | Chr 16       | NP_197423          | 81%        | $8.24 \times 10^{-5}$ |
| 1           | I                       | ribulose-phosphate 3-epimerase,RPE                                        | Chr 14       | NP_200949.         | 83%        | $2.34 \times 10^{-7}$ |
| Transporter |                         |                                                                           |              |                    |            |                       |
| 2           | S                       | lipid transfer protein                                                    | Chr 4        | NP_568699          | 50%        | $4.21 \times 10^{-8}$ |
| 4           | S                       | protease inhibitor/seed storage/lipid transfer protein family protein     | Chr 13       | NP_190966.         | 61%        | $3.25 \times 10^{-5}$ |
| 1           | S                       | Multidrug resistance-associated protein 3, ABC transporter family protein | Chr 14       | NP_187915          | 80%        | $5.63 \times 10^{-4}$ |
| 3           | I                       | White-brown complex homolog protein 23, ABC transporter family protein    | Chr 14       | NP_001031843       | 62%        | $3.84 \times 10^{-7}$ |
| 1           | I                       | H+/oligopeptide symporter POT family                                      | Chr 17       | NP_188804          | 77%        | $5.37 \times 10^{-3}$ |
| 1           | I                       | protease inhibitor/seed storage/lipid transfer protein                    | Chr 17       | NP_566036          | 76%        | $2.34 \times 10^{-5}$ |
| 3           | S                       | Protease inhibitor/seed storage/lipid transfer protein                    | Chr 13       | NP_568160          | 75%        | $7.86 \times 10^{-4}$ |
| 3           | I                       | nonspecific lipid transfer protein 1                                      | Chr 11       | NP_181388          | 45%        | $8.65 \times 10^{-8}$ |
| 4           | I                       | proton-dependent oligopeptide transport (POT) family protein              | Chr 16       | NP_177024          | 70%        | $2.41 \times 10^{-3}$ |
| 1           | I                       | Non-specific lipid-transfer protein 4                                     | Chr 11       | NP_568904          | 46%        | $4.36 \times 10^{-4}$ |
| 2           | I                       | hydrogen ion transporting ATP synthase                                    | Chr 17       | NP_001044491       | 60%        | $6.53 \times 10^{-4}$ |

Table S1. Cont.

| Number     | Expression <sup>a</sup> | Putative Annotation                                     | Genome locus | Genebank Accession | Identities | p-value <sup>b</sup>  |
|------------|-------------------------|---------------------------------------------------------|--------------|--------------------|------------|-----------------------|
| Metabolism |                         |                                                         |              |                    |            |                       |
| 1          | I                       | phosphatidylcholine-sterol<br>O-acyltransferase         | Chr 2        | NP_196868          | 78%        | $3.54 \times 10^{-3}$ |
| 1          | I                       | Flavonol synthase/flavanone 3-hydroxylase               | Chr 5        | EEF39692           | 77%        | $5.21 \times 10^{-7}$ |
| 1          | I                       | triose-phosphate isomerase                              | Chr 16       | NP_001077931       | 86%        | $3.57 \times 10^{-6}$ |
| 9          | I                       | fructose-bisphosphate aldolase                          | Chr 13       | NP_568049          | 82%        | $5.64 \times 10^{-8}$ |
| 1          | I                       | fructose-bisphosphate aldolase                          | Chr 15       | NP_175032          | 94%        | $3.98 \times 10^{-5}$ |
| 6          | I                       | fructose-bisphosphate aldolase                          | Chr 13       | NP_974710          | 80%        | $2.34 \times 10^{-4}$ |
| 8          | I                       | glyceraldehyde-3-phosphate dehydrogenase                | Chr 15       | NP_180004          | 89%        | $7.31 \times 10^{-3}$ |
| 1          | I                       | acyl-activating enzyme 11                               | Chr 9        | NP_176786          | 62%        | $5.39 \times 10^{-5}$ |
| 1          | I                       | carotenoid cleavage dioxygenase                         | Chr 16       | ABY47995           | 74%        | $6.28 \times 10^{-3}$ |
| 1          | S                       | Formate dehydrogenase                                   | Chr 17       | NP_196982          | 89%        | $7.65 \times 10^{-5}$ |
| 1          | S                       | Beta-amylase                                            | Chr 15       | NP_567523          | 73%        | $5.43 \times 10^{-7}$ |
| 1          | I                       | acyl-ACP thioesterase                                   | Chr 5        | NP_193041          | 64%        | $3.25 \times 10^{-3}$ |
| 1          | I                       | ATP synthase CF0 subunit IV                             | Chr 16       | YP_001806690       | 79%        | $2.31 \times 10^{-5}$ |
| 1          | I                       | ATP synthase                                            | Chr 1        | AAM64665           | 70%        | $3.56 \times 10^{-7}$ |
| 1          | I                       | NADH dehydrogenase I subunit N                          | Chr 11       | ACG27527           | 69%        | $6.54 \times 10^{-6}$ |
| 1          | I                       | dehydrodolichyl diphosphate synthase                    | Chr 12       | NP_001077518       | 45%        | $9.21 \times 10^{-3}$ |
| 1          | S                       | alcohol dehydrogenase                                   | Chr 13       | NP_173786          | 78%        | $8.37 \times 10^{-7}$ |
| 1          | I                       | Lipoxygenase                                            | Chr 7        | NP_177396          | 52%        | $6.53 \times 10^{-5}$ |
| 1          | S                       | RNA binding protein, TGH                                | Chr 6        | NP_197699          | 55%        | $6.28 \times 10^{-7}$ |
| 1          | S                       | Arginine/serine-rich zinc<br>knuckle-containing protein | Chr 5        | NP_850280          | 75%        | $2.37 \times 10^{-5}$ |
| 1          | I                       | XRCC4 homolog                                           | Chr 13       | NP_188951          | 72%        | $7.35 \times 10^{-7}$ |
| 1          | I                       | DNA-damage-repair/tolerance protein                     | Chr 8        | NP_173459          | 63%        | $8.51 \times 10^{-4}$ |
| 1          | S                       | DNA double-strand break repair rad50<br>ATPase          | —            | XP_002525969       | 49%        | $5.36 \times 10^{-3}$ |
| 1          | I                       | eukaryotic translation initiation factor 5A             | Chr 2        | AAL10404           | 95%        | $3.64 \times 10^{-5}$ |

Table S1. Cont.

| Number          | Expression <sup>a</sup> | Putative Annotation                                        | Genome locus | Genebank Accession | Identities | p-value <sup>b</sup>  |
|-----------------|-------------------------|------------------------------------------------------------|--------------|--------------------|------------|-----------------------|
| 1               | I                       | eukaryotic translation initiation factor 2B family protein | Chr 14       | NP_198680          | 70%        | $5.38 \times 10^{-8}$ |
| 1               | I                       | ATP synthase CF0 C subunit                                 | Chr 15       | NP_051046          | 98%        | $6.94 \times 10^{-4}$ |
| 1               | I                       | NAD-dependent epimerase/dehydratase                        | Chr 12       | NP_001148959       | 85%        | $5.75 \times 10^{-3}$ |
| 2               | I                       | (S)-2-hydroxy-acid oxidase                                 | Chr 5        | NP_850585          | 93%        | $5.34 \times 10^{-5}$ |
| 1               | I                       | (S)-2-hydroxy-acid oxidase                                 | Chr 10       | NP_188059          | 91%        | $6.28 \times 10^{-4}$ |
| 1               | S                       | terpene synthase/cyclase family protein                    | Chr 3        | NP_197784          | 47%        | $5.64 \times 10^{-7}$ |
| 1               | I                       | alcohol acyl transferase                                   | Chr 13       | AAU14879           | 88%        | $6.37 \times 10^{-7}$ |
| 1               | I                       | 3-oxo-5-alpha-steroid 4-dehydrogenase family protein       | —            | NP_177403          | 42%        | $2.89 \times 10^{-4}$ |
| 1               | S                       | malate oxidoreductase                                      | Chr 7        | NP_191966          | 71%        | $4.13 \times 10^{-4}$ |
| 1               | S                       | Nudix hydrolase homolog gene                               | Chr 6        | NP_565273          | 52%        | $4.28 \times 10^{-7}$ |
| 1               | S                       | ATP-dependent helicase                                     | Chr 12       | NP_188307          | 60%        | $1.89 \times 10^{-3}$ |
| 1               | I                       | haloacid dehalogenase-like hydrolase family protein        | Chr 14       | NP_181658          | 56%        | $6.14 \times 10^{-4}$ |
| 1               | I                       | thiamin diphosphokinase                                    | Chr 11       | NP_850424          | 66%        | $7.54 \times 10^{-4}$ |
| 1               | I                       | myo-inositol-1-phosphate synthase                          | Chr 6        | NP_195690          | 60%        | $8.69 \times 10^{-3}$ |
| 2               | I                       | inositol-3-phosphate synthase                              | Chr 6        | NP_196579          | 91%        | $1.47 \times 10^{-7}$ |
| 2               | S                       | chalcone synthase                                          | Chr 2        | NP_196897          | 69%        | $6.28 \times 10^{-8}$ |
| Protein related |                         |                                                            |              |                    |            |                       |
| 1               | S                       | histone deacetylase                                        | Chr 9        | XP_002326411       | 61%        | $3.49 \times 10^{-3}$ |
| 1               | S                       | Histone-lysine N-methyltransferase                         | Chr 15       | NP_849969.         | 68%        | $5.31 \times 10^{-4}$ |
| 6               | I                       | OTU-like cysteine protease family protein                  | Chr 11       | NP_175482          | 75%        | $6.79 \times 10^{-7}$ |
| 1               | I                       | glycine cleavage system H protein                          | Chr 6        | NP_174525          | 85%        | $8.23 \times 10^{-6}$ |
| 1               | I                       | Ubiquitin carboxyl-terminal hydrolase 23                   | Chr 14       | NP_568873          | 50%        | $5.32 \times 10^{-5}$ |
| 1               | I                       | Peptidase M3 family protein                                | Chr 1        | NP_569013          | 58%        | $1.03 \times 10^{-4}$ |
| 1               | S                       | asparagine synthase (glutamine-hydrolyzing)                | Chr 11       | AAO38524           | 75%        | $3.05 \times 10^{-3}$ |

Table S1. Cont.

| Number                           | Expression a | Putative Annotation                                 | Genome locus | Genebank Accession | Identities | p-value <sup>b</sup>  |
|----------------------------------|--------------|-----------------------------------------------------|--------------|--------------------|------------|-----------------------|
| 1                                | S            | glutamate-ammonia ligase                            | Chr 14       | NP_001051067       | 91%        | $3.60 \times 10^{-4}$ |
| 2                                | I            | alanine aminotransferase2                           | Chr 13       | NP_177215          | 92%        | $9.02 \times 10^{-6}$ |
| 1                                | S            | alanine aminotransferase1                           | Chr 9        | NP_173173          | 86%        | $2.34 \times 10^{-7}$ |
| 3                                | I            | Alanine-2-oxoglutarate aminotransferase1            | Chr 13       | NP_001031083       | 92%        | $6.12 \times 10^{-5}$ |
| 1                                | I            | ubiquitin-conjugating enzyme E2                     | Chr 4        | NP_567791          | 96%        | $8.05 \times 10^{-4}$ |
| 1                                | S            | Defective in cullin neddylation protein             | Chr 1        | EEF35070           | 77%        | $7.31 \times 10^{-4}$ |
| 1                                | S            | ubiquitin interaction motif-containing protein      | Chr 10       | NP_175034.         | 74%        | $6.03 \times 10^{-3}$ |
| 1                                | S            | Subtilase                                           | Chr 17       | NP_564107          | 49%        | $3.04 \times 10^{-3}$ |
| 1                                | I            | SIT4 phosphatase-associated family protein          | Chr 5        | NP_174335          | 79%        | $7.25 \times 10^{-5}$ |
| 1                                | I            | reticulon family protein                            | Chr 3        | NP_176592          | 57%        | $6.00 \times 10^{-3}$ |
| Cell maintenance and development |              |                                                     |              |                    |            |                       |
| 1                                | I            | 60S ribosomal protein L8                            | Chr 14       | NP_195336          | 91%        | $5.31 \times 10^{-4}$ |
| 1                                | I            | 40S ribosomal protein S23                           | Chr 3        | NP_001131287.      | 97%        | $5.14 \times 10^{-7}$ |
| 1                                | I            | 30S ribosomal protein S11                           | Chr 10       | NP_564385          | 54%        | $3.56 \times 10^{-3}$ |
| 1                                | S            | 40s ribosomal protein s13                           | Chr 2        | NP_567151          | 94%        | $8.34 \times 10^{-7}$ |
| 2                                | I            | 30S ribosomal protein S16                           | —            | NP_200504          | 91%        | $9.01 \times 10^{-6}$ |
| 1                                | I            | tropomyosin-related                                 | Chr 2        | NP_199627          | 62%        | $1.27 \times 10^{-3}$ |
| 2                                | S            | pollen Ole e 1 allergen and extensin family protein | Chr 17       | NP_197082          | 56%        | $5.39 \times 10^{-4}$ |
| 1                                | I            | dynein light chain                                  | Chr 3        | NP_194466          | 71%        | $4.23 \times 10^{-7}$ |
| 1                                | S            | chromosome-associated kinesin                       | Chr 8        | NP_200901          | 76%        | $2.08 \times 10^{-6}$ |
| 1                                | I            | pollen Ole e 1 allergen and extensin family protein | Chr 9        | NP_197082          | 62%        | $2.38 \times 10^{-4}$ |
| 1                                | S            | pectinesterase                                      | Chr 5        | NP_172624          | 37%        | $5.64 \times 10^{-3}$ |
| 1                                | I            | cellulose synthase                                  | Chr 8        | EEF33090           | 65%        | $4.30 \times 10^{-6}$ |
| 1                                | S            | O-methyltransferase                                 | Chr 5        | NP_195242          | 50%        | $2.08 \times 10^{-5}$ |
| 1                                | S            | O-methyltransferase                                 | Chr 16       | XP_002302676       | 57%        | $2.14 \times 10^{-4}$ |

Table S1. Cont.

| Number  | Expression <sup>a</sup> | Putative Annotation                  | Genome locus | Genebank Accession | Identities | p-value <sup>b</sup>  |
|---------|-------------------------|--------------------------------------|--------------|--------------------|------------|-----------------------|
| Others  |                         |                                      |              |                    |            |                       |
| 1       | S                       | KH domain-containing protein         | Chr 3        | NP_200425          | 84%        | $3.56 \times 10^{-7}$ |
| 1       | S                       | WD-40 repeat family protein          | Chr 10       | NP_566644          | 75%        | $8.30 \times 10^{-5}$ |
| 1       | S                       | VQ motif-containing protein          | Chr 14       | NP_195485          | 50%        | $2.37 \times 10^{-6}$ |
| 1       | I                       | NC domain-containing protein-related | Chr 1        | NP_563621          | 78%        | $2.68 \times 10^{-3}$ |
| 1       | I                       | ABI3-interacting protein             | Chr 6        | BAD19899           | 61%        | $8.50 \times 10^{-7}$ |
| 1       | I                       | GTP binding protein                  | Chr 11       | EEF44801           | 53%        | $7.21 \times 10^{-6}$ |
| 1       | S                       | DNA-binding protein                  | Chr 4        | NP_001151240       | 81%        | $3.45 \times 10^{-7}$ |
| 1       | I                       | Protein pob                          | Chr 10       | EEF41790           | 90%        | $5.31 \times 10^{-8}$ |
| 1       | I                       | peroxisomal membrane protein-related | Chr 3        | NP_564616          | 40%        | $2.75 \times 10^{-5}$ |
| 1       | I                       | FG-GAP repeat protein                | —            | XP_001265249       | 59%        | $5.31 \times 10^{-4}$ |
| 1       | I                       | ankyrin repeat-containing protein    | Chr 3        | EEF27218           | 50%        | $3.60 \times 10^{-3}$ |
| Unknown |                         |                                      |              |                    |            |                       |
| 1       | I                       | hypothetical protein                 | Chr 17       | YP_173415.         | 95%        | $8.14 \times 10^{-4}$ |
| 1       | S                       | unknown protein                      | Chr 10       | NP_194575          | 44%        | $7.02 \times 10^{-6}$ |
| 1       | S                       | unknown protein                      | Chr 7        | NP_191604          | 61%        | $\times 10^{-7}$      |
| 1       | S                       | unknown protein                      | Chr 2        | NP_566044.         | 38%        | $3.62 \times 10^{-8}$ |
| 1       | S                       | unknown protein                      | Chr 9        | NP_180647.         | 59%        | $3.74 \times 10^{-5}$ |
| 1       | S                       | unknown protein                      | Chr 1        | NP_569010.         | 31%        | $1.05 \times 10^{-4}$ |
| 1       | S                       | unknown protein                      | Chr 2        | NP_192113          | 38%        | $8.23 \times 10^{-6}$ |
| 1       | I                       | unnamed protein                      | —            | CAO21969           | 32%        | $9.79 \times 10^{-5}$ |
| 1       | S                       | unknown protein                      | Chr 12       | NP_564513          | 58%        | $3.59 \times 10^{-4}$ |
| 1       | S                       | unknown protein                      | Chr 7        | NP_182138          | 42%        | $2.74 \times 10^{-5}$ |
| 1       | S                       | unknown protein                      | Chr 5        | NP_176367          | 57%        | $3.85 \times 10^{-6}$ |
| 1       | I                       | unknown protein                      | Chr 9        | NP_193006          | 65%        | $5.23 \times 10^{-7}$ |
| 1       | I                       | unknown protein                      | Chr 15       | NP_568382          | 47%        | $4.39 \times 10^{-8}$ |
| 1       | I                       | unnamed protein                      | Chr 3        | CAO21221           | 74%        | $3.23 \times 10^{-5}$ |
| 1       | S                       | Predicted protein                    | Chr 1        | XP_002302313       | 50%        | $5.04 \times 10^{-4}$ |

Table S1. Cont.

| Number | Expression a | Putative Annotation     | Genome locus | Genebank Accession | Identities | p-value b             |
|--------|--------------|-------------------------|--------------|--------------------|------------|-----------------------|
| 1      | S            | unknown protein         | Chr 17       | NP_172138          | 57%        | $4.65 \times 10^{-3}$ |
| 1      | I            | hypothetical protein    | Chr 7        | XP_002282574       | 70%        | $6.37 \times 10^{-7}$ |
| 1      | I            | predicted protein       | Chr 6        | XP_002298251       | 59%        | $1.85 \times 10^{-8}$ |
| 1      | I            | hypothetical protein    | Chr 4        | XP_002264843       | 70%        | $2.13 \times 10^{-6}$ |
| 1      | I            | predicted protein       | Chr 3        | XP_002303990       | 90%        | $5.36 \times 10^{-6}$ |
| 1      | S            | unnamed protein product | —            | BAE89103           | 100%       | $5.98 \times 10^{-7}$ |
| 1      | I            | predicted protein       | Chr 12       | XP_002305421       | 51%        | $2.30 \times 10^{-4}$ |
| 1      | S            | hypothetical protein    | Chr 12       | XP_002266957       | 55%        | $6.67 \times 10^{-7}$ |
| 1      | I            | predicted protein       | Chr 8        | XP_002330640       | 45%        | $8.32 \times 10^{-6}$ |
| 1      | I            | predicted protein       | Chr 9        | XP_002305896       | 60%        | $3.54 \times 10^{-4}$ |
| 1      | I            | hypothetical protein    | Chr 11       | XP_002273979       | 53%        | $2.70 \times 10^{-3}$ |

<sup>a</sup>S means suppression, I means induction; <sup>b</sup>P-value indicates probability of a gene showing significantly differential expression between salt-treated samples and untreated samples at significance level of 0.05 using FDR correction.

**Table S2.** Gene homologs of unigenes in Arabidopsis in the interaction network.

| Microarray Gene<br>AGI Code <sup>a</sup> | Microarray Gene                              | Interaction protein<br>AGI Code <sup>a</sup> | Interaction protein Annotation             |
|------------------------------------------|----------------------------------------------|----------------------------------------------|--------------------------------------------|
| At1g61520                                | LHCA3                                        | At2g16740                                    | ubiquitin-protein ligase                   |
| At1g61520                                | LHCA3                                        | At2g22040                                    | WD-40 repeat family protein                |
| At3g13080                                | ABC transporter family<br>protein            | At5g54200                                    | WD-40 repeat family protein                |
| At3g16840                                | ATP-dependent helicase                       | At1g30270                                    | serine/threonine kinase                    |
| At3g16840                                | ATP-dependent helicase                       | At1g59760                                    | ATP-dependent helicase                     |
| At3g16840                                | ATP-dependent helicase                       | At2g46070                                    | MAPK                                       |
| At3g16840                                | ATP-dependent helicase                       | At5g15550                                    | WD-40 repeat family protein                |
| At3g16840                                | ATP-dependent helicase                       | At2g01830                                    | osmosensor                                 |
| At2g37770                                | aldo/keto reductase family<br>protein        | At2g21250                                    | mannose 6-phosphate reductase              |
| At2g37770                                | aldo/keto reductase family<br>protein        | At3g18860                                    | WD-40 repeat family protein                |
| At2g37770                                | aldo/keto reductase family<br>protein        | At4g32410                                    | cellulose synthase                         |
| At2g17440                                | leucine-rich repeat family<br>protein        | At1g55860                                    | ubiquitin-protein ligase                   |
| At2g17440                                | leucine-rich repeat family<br>protein        | At2g41860                                    | CDPK                                       |
| At2g17440                                | leucine-rich repeat family<br>protein        | At3g10920                                    | SOD                                        |
| At3g12580                                | Heat shock protein                           | At1g62740                                    | stress-inducible protein                   |
| At3g12580                                | Heat shock protein                           | At2g16740                                    | ubiquitin-protein ligase                   |
| At3g12580                                | Heat shock protein                           | At2g32850                                    | protein kinase family protein              |
| At3g12580                                | Heat shock protein                           | At1g54270                                    | ATP-dependent helicase                     |
| At3g12580                                | Heat shock protein                           | At3g07200                                    | zinc finger family protein                 |
| At3g12580                                | Heat shock protein                           | At3g12580                                    | Heat shock protein                         |
| At3g12580                                | Heat shock protein                           | At3g61430                                    | PIP1A                                      |
| At3g12580                                | Heat shock protein                           | At5g03720                                    | Heat shock transcription factor            |
| At3g12580                                | Heat shock protein                           | At4g35310                                    | CDPK                                       |
| At3g12580                                | Heat shock protein                           | At5g54200                                    | WD-40 repeat family protein                |
| At1g06040                                | STO                                          | At2g32950                                    | ubiquitin-protein ligase                   |
| At1g50670                                | OTU-like cysteine protease<br>family protein | At3g18860                                    | WD-40 repeat family protein                |
| At1g32470                                | glycine cleavage system H<br>protein         | At1g27320                                    | osmosensor                                 |
| At1g32470                                | glycine cleavage system H<br>protein         | At3g18520                                    | histone deacetylase                        |
| At1g32470                                | glycine cleavage system H<br>protein         | At5g09590                                    | Heat shock protein                         |
| At1g32470                                | glycine cleavage system H<br>protein         | At5g53300                                    | ubiquitin-protein ligase                   |
| At3g47340                                | asparagine synthase                          | At4g18900                                    | WD-40 repeat family protein                |
| At4g27960                                | ubiquitin-protein ligase                     | At1g26830                                    | ubiquitin-protein ligase                   |
| At4g27960                                | ubiquitin-protein ligase                     | At3g10910                                    | zinc finger family protein                 |
| At4g27960                                | ubiquitin-protein ligase                     | At4g22120                                    | early-responsive to dehydration<br>protein |
| At4g35090                                | catalase                                     | At1g20260                                    | H <sup>+</sup> -ATPase                     |
| At4g35090                                | catalase                                     | At2g33210                                    | Heat shock protein                         |
| At4g35090                                | catalase                                     | At3g47520                                    | malate dehydrogenase                       |

Table S2. Cont.

| Microarray Gene<br>AGI Code <sup>a</sup> | Microarray Gene                       | Interaction protein<br>AGI Code <sup>a</sup> | Interaction protein Annotation        |
|------------------------------------------|---------------------------------------|----------------------------------------------|---------------------------------------|
| At4g35090                                | catalase                              | At4g33950                                    | serine/threonine kinase               |
| At4g35090                                | catalase                              | At4g35090                                    | catalase                              |
| At4g35090                                | catalase                              | At5g53120                                    | spermidine synthase                   |
| At5g51970                                | sorbitol dehydrogenase                | At3g28715                                    | H <sup>+</sup> -ATPase                |
| At5g51970                                | sorbitol dehydrogenase                | At4g37910                                    | heat shock protein                    |
| At5g51970                                | sorbitol dehydrogenase                | At5g51970                                    | sorbitol dehydrogenase                |
| At2g21250                                | mannose 6-phosphate<br>reductase      | At1g80030                                    | Heat shock protein                    |
| At2g21250                                | mannose 6-phosphate<br>reductase      | At2g21250                                    | mannose 6-phosphate reductase         |
| At2g21250                                | mannose 6-phosphate<br>reductase      | At3g61430                                    | PIP1A                                 |
| At2g21250                                | mannose 6-phosphate<br>reductase      | At4g04700                                    | CDPK                                  |
| At2g21250                                | mannose 6-phosphate<br>reductase      | At5g45420                                    | MYB                                   |
| At2g21250                                | mannose 6-phosphate<br>reductase      | At5g54200                                    | WD-40 repeat family protein           |
| At3g61430                                | PIP1A                                 | At1g55730                                    | calcium:cation antiporter             |
| At3g61430                                | PIP1A                                 | At2g16740                                    | ubiquitin-protein ligase              |
| At3g61430                                | PIP1A                                 | At3g47940                                    | Heat shock protein                    |
| At3g61430                                | PIP1A                                 | At4g35310                                    | CDPK                                  |
| At3g61430                                | PIP1A                                 | At5g06420                                    | zinc finger family protein            |
| At3g61430                                | PIP1A                                 | At5g37850                                    | SOS4                                  |
| At3g61430                                | PIP1A                                 | At5g45420                                    | MYB                                   |
| At3g61430                                | PIP1A                                 | At5g54200                                    | WD-40 repeat family protein           |
| At5g05690                                | Cytochrome P450                       | At4g11330                                    | MAPK                                  |
| At3g19590                                | WD-40 repeat family<br>protein        | At2g20635                                    | serine/threonine kinase               |
| At5g56140                                | KH domain-containing<br>protein       | At3g04380                                    | histone-lysine<br>N-methyltransferase |
| At5g56140                                | KH domain-containing<br>protein       | At5g46190                                    | KH domain-containing protein          |
| At2g17900                                | Histone-lysine<br>N-methyltransferase | At5g26751                                    | serine/threonine kinase               |
| At2g17900                                | Histone-lysine<br>N-methyltransferase | At5g46190                                    | KH domain-containing protein          |
| At2g17900                                | Histone-lysine<br>N-methyltransferase | At5g52640                                    | Heat shock protein                    |
| At5g20930                                | serine/threonine kinase               | At5g20930                                    | serine/threonine kinase               |
| At5g10930                                | CIPK5                                 | At1g25155                                    | anthranilate synthase                 |
| At5g10930                                | CIPK5                                 | At2g31910                                    | sodium:hydrogen antiporter            |
| At5g10930                                | CIPK5                                 | At4g26570                                    | CBL                                   |
| At5g10930                                | CIPK5                                 | At5g10930                                    | CIPK5                                 |

**Table S2. Cont.**

| Microarray Gene<br>AGI Code <sup>a</sup> | Microarray Gene                 | Interaction protein<br>AGI Code <sup>a</sup> | Interaction protein Annotation        |
|------------------------------------------|---------------------------------|----------------------------------------------|---------------------------------------|
| At4g30960                                | CIPK6                           | At2g26650                                    | inward rectifier potassium<br>channel |
| At4g30960                                | CIPK6                           | At3g43810                                    | CAM                                   |
| At4g30960                                | CIPK6                           | At5g24270                                    | CBL                                   |
| At1g76880                                | trihelix DNA-binding<br>protein | At1g59580                                    | MAPK                                  |
| At1g76880                                | trihelix DNA-binding<br>protein | At1g76880                                    | trihelix DNA-binding protein          |
| At2g37260                                | WRKY                            | At4g11330                                    | MAPK                                  |
| At1g19210                                | DREB                            | At4g11330                                    | MAPK                                  |
| At1g06040                                | STO                             | At2g32950                                    | ubiquitin-protein ligase              |

<sup>a</sup> Arabidopsis Genome Initiative.**Table S3.** Primers used in semi-quantitative RT-PCR.

| Gene           | Primer sequence (5'→3')                           | T <sub>m</sub> (°C) | Cycles |
|----------------|---------------------------------------------------|---------------------|--------|
| <i>MzTSL</i>   | F:AAGCAGAGTTACATACGGCA<br>R:TAATGATCCTAGCTTCCCTC  | 53                  | 28     |
| <i>MzILR</i>   | F:CCTGGCTTTTTCGCTCCC<br>R:CGGTGGGCGGAGTACATG      | 53                  | 28     |
| <i>MzCIPK</i>  | F:CGAGCTCCACGAGGTCAT<br>R:AAGTTGCCGTCTTGGTCTA     | 53                  | 28     |
| <i>MzIAA</i>   | F:TTGGGTTCCTTTAGTAGATT<br>R:TAACCTCTTCAAATCTCAAA  | 53                  | 28     |
| <i>MzSCL</i>   | F:CAGATAGATGCCTACGGG<br>R:CACCTTGCCATACCACTC      | 53                  | 28     |
| <i>MzSTO</i>   | F:CAGAGCCCTCATTTGTCA<br>R:ATCGTCCTCCAGCATTTC      | 53                  | 28     |
| <i>MzGTL</i>   | F:ATGTCCTTACTTTCACCTGCTA<br>R:GCCTCACCATCAGAGGTAC | 53                  | 28     |
| <i>MzDREB1</i> | F:GCACTTTCACTGCATGTCAA<br>R:TTCCGACACCCATTGTC     | 52                  | 32     |
| <i>MzRCA</i>   | F:TGTAGTCGCAGCTCCTCA<br>R:CATCTGTCCTGGTTGGTTT     | 52                  | 32     |
| <i>MzLhcb2</i> | F:ATGGCAACCTCTGCTATCC<br>R:GCAGTGTCCCATCCGTAG     | 52                  | 30     |
| <i>MzRPE</i>   | F:TCGGCTGCTTCACTTTGT<br>R:CACAACCTGCCAACTCTACA    | 52                  | 30     |
| <i>MzSDH</i>   | F:AGGGAGGTTGATGTGGTT<br>R:GTAGAAACCAGAACTTTGTCC   | 52                  | 38     |
| <i>MzHSP70</i> | F:CTGCGATTCTTTGCTTGTT<br>R:CAGTAAACGCCACGTAAGA    | 52                  | 31     |
| <i>MzNTR</i>   | F:CCCCGCTTTCTTCCTAAC<br>R:TACACCTGCCAGCACTCC      | 52                  | 34     |

**Table S3.** *Cont.*

| Gene            | Primer sequence (5'→3')                                 | T <sub>m</sub> ( °C) | Cycles |
|-----------------|---------------------------------------------------------|----------------------|--------|
| <i>MzRD22</i>   | F:ATGCTGCTCTACCACTCA<br>R:TTGACACCACCTTTCCTA            | 52                   | 32     |
| <i>MzPIP1;1</i> | F:GTTACACCAAGGGTCAAGGA<br>R:CTGGGACTGGAAAGGGAT          | 53                   | 32     |
| <i>MzTIP2</i>   | F:CTGCTTTCTCCCTATCGTC<br>R:AGTGGTTGTCCCATGTCC           | 53                   | 32     |
| <i>MzUK1</i>    | F:GGTGAATCCGATTAGTAATGGTG<br>R:CCTAATTCCCAAGTAACCTCTTCT | 53                   | 28     |

© 2013 by the authors; licensee MDPI, Basel, Switzerland. This article is an open access article distributed under the terms and conditions of the Creative Commons Attribution license (<http://creativecommons.org/licenses/by/3.0/>).
